# Supplementary material for: Planar trinuclear complexes with linear arrays of metal ions
Source: Royal Society of Chemistry journal article supplement (doi:10.1039/c4qi00172a), 2014-12-26
Supplement: c4qi00172a1.pdf [file c4qi00172a1.pdf]

## Supporting Information

Planar trinuclear complexes with linear arrays of metal ions

Shotaro Terashima, Graham N. Newton, Takuya Shiga\* and  
Hiroki Oshio\*

Prof. H. Oshio  
Graduate School of Pure and Applied Sciences,  
University of Tsukuba  
Tennodai 1-1-1, Tsukuba, Ibaraki 305-8571 (Japan)  
FAX: (+81)29-852-5923  
E-mail: oshio@chem.tsukuba.ac.jp

## Synthesis of precursor of ligand

**1,6-di( $\beta$ -pyridyl)-1,3,4,6-hexanetetrone:** A solution of sodium ethoxide (prepared from sodium (5.00 g, 217 mmol)), 2-acetylpyridine (26.3 g, 217 mmol), and ethyl oxalate (14.6 g, 100 mmol) in 120 mL of toluene was refluxed for 2 h under a nitrogen atmosphere. The solvent was removed by filtration, and aqueous acetic acid (15%) was added to the residue. The resulting yellow solid (2.4 g) was filtered, and used for the following ring-closure reaction without purification.

## Synthesis of ligand

### 5,5'-pyridyl-3,3'-bi-1H-pyrazolyl ( $H_2L$ )

Hydrazine monohydrate (1.35 g, 27.0 mmol) was added to a chloroform solution (100 mL) of crude product of 1,6-di( $\beta$ -pyridyl)-1,3,4,6-hexanetetrone (2.0 g, 6.75 mmol), and the mixture was refluxed for 2 h. After cooling the mixed solution, the resulting colorless powder was filtered, and recrystallized from methanol to yield colorless microcrystals (0.72 g, 37 %).  $^1H$  NMR (400 MHz, DMSO- $d_6$ ):  $\delta$  13.6 (s, 2H, pz), 8.64 (d, 2H, py), 7.98-7.87 (m, 4H, py), 7.36 (m, 2H, py), 7.23 (s, 2H, pz). Selected IR (KBr): 3128(w), 1593(s), 1567(s), 1460(s), 1402(s), 1353(s), 1195(s), 1058(s), 994(s), 786(s)  $cm^{-1}$ . Anal. Calcd. (found) for  $C_{16}H_{13}N_6O_{0.5}$  ( $H_2L \cdot 0.5H_2O$ ): C, 64.63 (64.76); H, 4.41 (4.36); N, 28.27 (28.11).

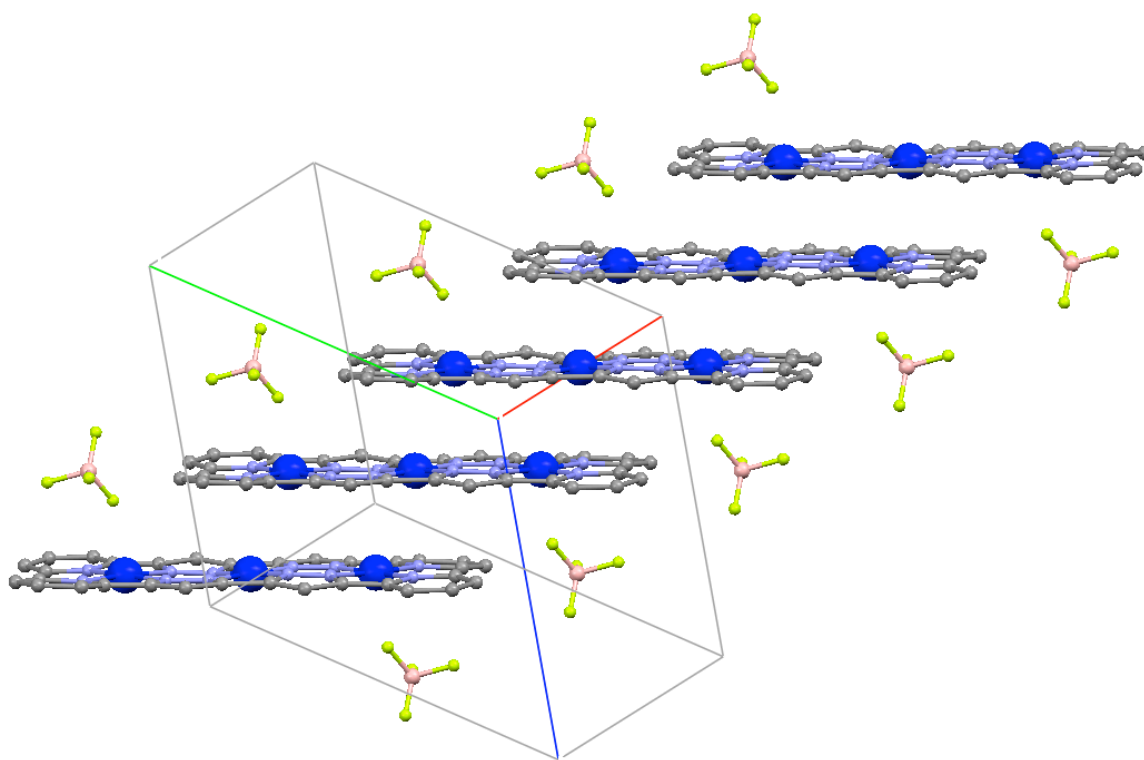

**Figure S1.** Packing structure of **1**.
